# Supplementary material
Source: publisher figshare collection journal article supplement (https://aacr.figshare.com/ndownloader/files/45061826)
Supplement: Supplementary file 1 [file 45061826]

Table S1. Summary of targeted driver mutations for ctDNA detection

| UPN | Gene | Amino acid change | Fusion transcripts of gene rearrangements |
| --- | --- | --- | --- |
| 617 | NRAS | G13C | CBFβ/MYH11 |
| 720 | CEBPA | K304_K305insLR | CBFβ/MYH11 |
| 841 | c-KIT | N822K | CBFβ/MYH11 |
| 707 | EZH2 | T80Lfs*6 | - |
| 919 | CEBPA | c.912_913insTTG | CBFβ/MYH11 |
| 766 | CEBPA | K313delK | - |
| 317 | MPL | S505N | - |
| 775 | NPM1 | c.869_875 | NUP98-RARG |
| 699 | c-KIT | D816V | - |
| 240 | NPM1 | c.863_864insTATG | - |
| 195 | MPL | S505N | - |
| 290 | PTPN11 | A72V | RUNX1/RUNX1T1 |
| 821 | c-KIT | D820_N822delinsESK | - |
| 904 | U2AF1 | S34Y | - |
| 965 | FLT3 | Y589D | - |
| 496 | c-KIT | N822K | - |
| 513 | IDH1 | R132H | RUNX1/RUNX1T1 |
| 819 | FLT3 | D835E | RUNX1/RUNX1T1 |
| 502 | PTPN11 | D61Y | KMT2A-SEPT6 |
| 959 | KRAS | G13D | KMT2A -AF9 |
| 662 | NPM1 | c.863_864insTCGG | - |
| 977 | c-KIT | D816V | - |
| 170 | KRAS | c.29_31dup | RUNX1/RUNX1T1 |
| 671 | U2AF1 | S34Y | RUNX1/RUNX1T1 |
| 412 | KMT2C | I2391L | - |
| 685 | c-KIT | D419 | - |
| 110 | CEBPA | c.927_928insGAG | KMT2A -AF9 |
| 241 | CSF3R | T618I | - |
| 225 | c-KIT | N822K | RUNX1/RUNX1T1 |
| 723 | NRAS | Q61R | - |
| 398 | PTPN11 | V45L | - |
| 157 | PTPN11 | S502A | RUNX1/RUNX1T1 |
| 372 | NPM1 | c.863_864insTCTG | RUNX1/RUNX1T1 |
| 647 | U2AF1 | S34Y | RUNX1/RUNX1T1 |
| 931 | CEBPA | c.937_939dup | RUNX1/RUNX1T1 |
| 280 | CEBPA | c.934_936dup | NUP98-HOXA9 |
| 171 | DNM2 | T274fs | RUNX1/RUNX1T1 |
| 614 | JAK3 | M511I | - |
| 961 | CEBPA | c.938_939insTCT | KMT2A-AF9 |
| 349 | c-KIT | D816H | RUNX1/RUNX1T1 |
| 144 | NRAS | G12D | - |
| 667 | CEBPA | c.926_928dup | - |
| 770 | KRAS | G13D | RUNX1/RUNX1T1 |
| 544 | BCOR | A1190fs | KMT2A-ELL |
| 670 | SETD2 | S1572fs | CBFβ/MYH11 |
| 246 | KRAS | G13D | - |
| 373 | c-KIT | N822K;c.2466T>A | - |
| 946 | KMD6A | c.1172delinsATTG | - |
| 231 | FLT3 | L576P | RUNX1/RUNX1T1 |
| 790 | c-KIT | D820Y | RUNX1/RUNX1T1 |
